# Supplementary material for: Rapid Enabling of Gluconobacter oxydans Resistance to High D-Sorbitol Concentration and High Temperature by Microdroplet-Aided Adaptive Evolution
Source: Front Bioeng Biotechnol. 2021 Sep 3;9:731247. doi: 10.3389/fbioe.2021.731247 (PMC8446438; doi:10.3389/fbioe.2021.731247)
Supplement: Supplementary file 1 [file DataSheet1.CSV]

## Sheet: Table S1
CHROM	POS	REF	ALT	TYPE	FILTER	Samples	TRANSITION	HET	HOM-REF	HOM-VAR	NO-CALL	VAR	AC	AF	AN	QUAL	DP	QD	MQ	BaseQRankSum	ReadPosRankSum	MQRankSum	FS	MMC1.DP	MMC1.GQ	MMC1.AD	MMC8.DP	MMC8.GQ	MMC8.AD	MMC9.DP	MMC9.GQ	MMC9.AD	MMC10.DP	MMC10.GQ	MMC10.AD	MMC2.DP	MMC2.GQ	MMC2.AD	MMC3.DP	MMC3.GQ	MMC3.AD	MMC4.DP	MMC4.GQ	MMC4.AD	MMC5.DP	MMC5.GQ	MMC5.AD	MMC6.DP	MMC6.GQ
Chr1	40653	T	C	SNP	PASS	MMC8,MMC9,MMC10,MMC3,MMC4,MMC5,MMC6,MMC7	1	0	2	8	0	8	16	0.8	20	110586	3011	25.36	60	-0.612	-0.031	0	0	50	99	50,0	355	99	0,355	334	99	0,334	327	99	0,327	50	99	50,0	448	99	1447	358	99	0,358	392	99	0,392	354	99
Chr1	74632	T	TG	INDEL	PASS	MMC1,MMC8,MMC9,MMC10,MMC2,MMC3,MMC4,MMC5,MMC6,MMC7	-1	0	0	10	0	10	20	1	20	132994	3581	28.73	60	-0.465	-1.15	0	0	359	99	0,359	377	99	0,377	331	99	0,331	330	99	0,330	320	99	0,320	412	99	0,412	388	99	0,388	365	99	1364	331	99
Chr1	177444	CGGGCGTTATCTGGTCGATCACCTCGAACATTGCGGCACATGCCACACACCGCGCACCATGCTCATGGGGCCGGCGAGA	C	INDEL	PASS	MMC1	-1	0	9	1	0	1	2	0.1	20	9854.08	602	30.97	60	NA	NA	NA	0	37	99	37,0	36	99	36,0	39	99	39,0	39	99	39,0	219	99	0,219	36	99	36,0	42	99	42,0	40	99	40,0	42	99
Chr1	247860	T	G	SNP	PASS	MMC10	0	1	9	0	0	1	1	0.05	20	39.65	92	2.33	40	-1.52	1.38	0	0	7	18	7,0	10	30	10,0	10	14	10,0	17	51	12,5	11	17	11,0	7	18	7,0	5	15	5,0	13	33	13,0	10	14
Chr1	339189	G	A	SNP	PASS	MMC9	1	1	9	0	0	1	1	0.05	20	2542.39	779	7.85	60	0.768	0.682	0	8.638	34	99	34,0	34	99	34,0	324	99	234,90	35	99	35,0	34	99	34,0	37	99	37,0	34	99	34,0	35	99	35,0	177	99
Chr1	351480	C	A	SNP	PASS	MMC4,MMC6	0	0	8	2	0	2	4	0.2	20	28943.5	1307	27.24	60	-1.38	1.4	0	2.158	34	99	34,0	34	99	34,0	268	99	268,0	35	99	35,0	34	99	34,0	37	99	37,0	384	99	7377	35	99	35,0	411	99
Chr1	376628	T	C	SNP	PASS	MMC1,MMC8,MMC9,MMC10,MMC2,MMC3,MMC4,MMC5,MMC6,MMC7	1	0	0	10	0	10	20	1	20	159533	4209	28.2	60	-0.549	-1.34	0	0	393	99	0,393	466	99	0,466	369	99	0,369	360	99	0,360	427	99	0,427	504	99	0,504	474	99	1473	446	99	0,446	403	99
Chr1	395619	G	T	SNP	PASS	MMC1,MMC8,MMC9,MMC10,MMC2,MMC3,MMC4,MMC5,MMC6,MMC7	0	0	0	10	0	10	20	1	20	187593	4206	25	60	NA	NA	NA	0	412	99	0,412	453	99	0,453	416	99	0,414	366	99	0,366	424	99	0,422	512	99	0,509	443	99	0,441	421	99	0,417	367	99
Chr1	395624	G	GCT	INDEL	PASS	MMC1,MMC8,MMC9,MMC10,MMC2,MMC3,MMC4,MMC5,MMC6,MMC7	-1	0	0	10	0	10	20	1	20	171488	4122	29.56	60	-0.816	-0.065	0	0	398	99	2396	436	99	0,434	399	99	3394	355	99	0,355	409	99	1406	490	99	0,487	423	99	0,421	398	99	3391	354	99
Chr1	395627	G	GT	INDEL	PASS	MMC1,MMC8,MMC9,MMC10,MMC2,MMC3,MMC4,MMC5,MMC6,MMC7	-1	0	0	10	0	10	20	1	20	171075	4114	30.62	60	3.89	-0.116	0	0	411	99	2409	443	99	0,443	420	99	3417	357	99	0,357	407	99	0,407	496	99	0,496	432	99	0,432	420	99	3415	363	99
Chr1	395642	CG	C	INDEL	PASS	MMC1,MMC8,MMC9,MMC10,MMC2,MMC3,MMC4,MMC5,MMC6,MMC7	-1	0	0	10	0	10	20	1	20	170255	4073	28.17	60	NA	NA	NA	0	415	99	0,415	452	99	0,452	415	99	0,415	348	99	0,348	382	99	0,382	486	99	0,484	435	99	0,435	422	99	0,422	349	99
Chr1	395821	GC	G	INDEL	PASS	MMC1,MMC8,MMC9,MMC10,MMC2,MMC3,MMC4,MMC5,MMC6,MMC7	-1	0	0	10	0	10	20	1	20	123703	3558	26.8	60	NA	NA	NA	0	366	99	0,366	402	99	0,402	308	99	0,308	320	99	0,320	337	99	0,337	394	99	0,394	368	99	0,368	352	99	0,352	327	99
Chr1	395969	AC	A	INDEL	PASS	MMC1,MMC8,MMC9,MMC10,MMC2,MMC3,MMC4,MMC5,MMC6,MMC7	-1	0	0	10	0	10	20	1	20	132367	3804	26	60	NA	NA	NA	0	387	99	0,387	424	99	0,424	366	99	0,366	359	99	0,359	340	99	0,340	415	99	0,415	351	99	0,351	387	99	0,387	356	99
Chr1	396338	ACG	A	INDEL	PASS	MMC1,MMC8,MMC9,MMC10,MMC2,MMC3,MMC4,MMC5,MMC6,MMC7	-1	0	0	10	0	10	20	1	20	173321	4095	30.02	60	2.32	0.759	0	0	403	99	0,403	423	99	0,423	371	99	0,371	339	99	0,339	368	99	0,368	438	99	0,438	414	99	0,414	434	99	0,434	380	99
Chr1	396346	C	CT	INDEL	PASS	MMC1,MMC8,MMC9,MMC10,MMC2,MMC3,MMC4,MMC5,MMC6,MMC7	-1	0	0	10	0	10	20	1	20	183409	4031	31.98	60	NA	NA	NA	0	416	99	0,413	429	99	0,429	374	99	0,374	344	99	0,344	367	99	0,367	439	99	0,439	420	99	0,420	443	99	0,443	387	99
Chr1	396849	T	TG	INDEL	PASS	MMC1,MMC8,MMC9,MMC10,MMC2,MMC3,MMC4,MMC5,MMC6,MMC7	-1	0	0	10	0	10	20	1	20	136016	3724	27.51	60	2.9	1.49	0	0	420	99	0,420	391	99	0,391	361	99	0,361	321	99	0,319	342	99	0,342	411	99	0,411	371	99	0,371	378	99	0,378	340	99
Chr1	396885	C	CG	INDEL	PASS	MMC1,MMC8,MMC9,MMC10,MMC2,MMC3,MMC4,MMC5,MMC6,MMC7	-1	0	0	10	0	10	20	1	20	134683	3629	29.11	60	NA	NA	NA	0	418	99	0,418	393	99	0,393	360	99	0,360	286	99	0,286	346	99	0,346	400	99	0,400	381	99	0,381	363	99	0,363	318	99
Chr1	397590	T	TA	INDEL	PASS	MMC1,MMC8,MMC9,MMC10,MMC2,MMC3,MMC4,MMC5,MMC6,MMC7	-1	0	0	10	0	10	20	1	20	141348	3858	28.08	60	NA	NA	NA	0	417	99	0,417	394	99	0,394	366	99	0,366	329	99	0,329	360	99	0,360	393	99	0,393	392	99	0,392	411	99	0,411	374	99
Chr1	398286	C	CT	INDEL	PASS	MMC1,MMC8,MMC9,MMC10,MMC2,MMC3,MMC4,MMC5,MMC6,MMC7	-1	0	0	10	0	10	20	1	20	161416	4437	23.23	60	0.07	1.5	0	0	421	99	0,421	450	99	0,450	427	99	0,427	363	99	0,363	464	99	0,464	471	99	2469	462	99	0,462	455	99	0,455	437	99
Chr1	399027	C	CGT	INDEL	PASS	MMC1,MMC8,MMC9,MMC10,MMC2,MMC3,MMC4,MMC5,MMC6,MMC7	-1	0	0	10	0	10	20	1	20	170318	3811	29.03	60	NA	NA	NA	0	394	99	0,394	444	99	0,444	394	99	0,394	315	99	0,315	389	99	0,389	432	99	0,432	334	99	0,334	347	99	0,345	345	99
Chr1	399621	A	AAG	INDEL	PASS	MMC1,MMC8,MMC9,MMC10,MMC2,MMC3,MMC4,MMC5,MMC6,MMC7	-1	0	0	10	0	10	20	1	20	189170	4212	30.67	60	-0.519	1.56	0	0	425	99	0,425	450	99	1447	364	99	0,364	373	99	0,373	443	99	0,443	478	99	0,478	441	99	0,441	430	99	0,426	388	99
Chr1	400096	CG	C	INDEL	PASS	MMC1,MMC8,MMC9,MMC10,MMC2,MMC3,MMC4,MMC5,MMC6,MMC7	-1	0	0	10	0	10	20	1	20	183538	4164	26.61	59.99	NA	NA	NA	0	417	99	0,417	465	99	0,465	364	99	0,364	380	99	0,380	402	99	0,402	461	99	0,461	420	99	0,420	417	99	0,417	396	99
Chr1	400106	CA	C	INDEL	PASS	MMC1,MMC8,MMC9,MMC10,MMC2,MMC3,MMC4,MMC5,MMC6,MMC7	-1	0	0	10	0	10	20	1	20	180183	3973	29.2	59.99	NA	NA	NA	0	405	99	0,405	453	99	0,453	365	99	0,365	372	99	0,372	388	99	0,388	439	99	0,439	415	99	0,415	394	99	0,393	390	99
Chr1	400132	CAAAAAAAAAAAAAAAAAAAAAAAAAAAA	C	INDEL	PASS	MMC1,MMC8,MMC9,MMC10,MMC2,MMC3,MMC4,MMC5,MMC6,MMC7	-1	0	0	10	0	10	20	1	20	159287	3532	28.55	59.98	3.21	1.4	0	0	373	99	4369	401	99	2399	327	99	1326	337	99	0,337	352	99	1351	369	99	3364	365	99	0,365	347	99	1346	342	99
Chr1	400167	CA	C	INDEL	PASS	MMC1,MMC8,MMC9,MMC10,MMC2,MMC3,MMC4,MMC5,MMC6,MMC7	-1	0	0	10	0	10	20	1	20	158685	3433	34.42	59.99	NA	NA	NA	0	363	99	0,363	391	99	0,391	315	99	0,315	320	99	0,320	359	99	0,359	333	99	0,333	360	99	0,360	337	99	0,337	337	99
Chr1	400192	CA	C	INDEL	PASS	MMC1,MMC8,MMC9,MMC10,MMC2,MMC3,MMC4,MMC5,MMC6,MMC7	-1	0	0	10	0	10	20	1	20	154365	3317	28.53	59.98	NA	NA	NA	0	365	99	0,365	383	99	0,383	307	99	0,307	325	99	0,325	352	99	0,352	249	99	0,249	352	99	0,352	331	99	0,331	328	99
Chr1	400195	TG	T	INDEL	PASS	MMC1,MMC8,MMC9,MMC10,MMC2,MMC3,MMC4,MMC5,MMC6,MMC7	-1	0	0	10	0	10	20	1	20	151505	3283	27.23	59.98	NA	NA	NA	0	362	99	0,362	386	99	0,386	299	99	0,299	325	99	0,325	348	99	0,348	241	99	0,241	352	99	0,352	330	99	0,330	319	99
Chr1	400206	GT	G	INDEL	PASS	MMC1,MMC8,MMC9,MMC10,MMC2,MMC3,MMC4,MMC5,MMC6,MMC7	-1	0	0	10	0	10	20	1	20	147037	3233	29.52	59.98	NA	NA	NA	0	351	99	0,351	390	99	0,390	309	99	0,309	319	99	0,319	348	99	0,348	203	99	0,203	365	99	0,365	333	99	0,333	289	99
Chr1	400242	TTC	T	INDEL	PASS	MMC1,MMC8,MMC9,MMC10,MMC2,MMC3,MMC4,MMC5,MMC6,MMC7	-1	0	0	10	0	10	20	1	20	140164	3130	33.47	59.99	NA	NA	NA	0	339	99	0,339	401	99	0,401	330	99	0,330	315	99	0,315	365	99	0,365	163	99	0,163	344	99	0,344	360	99	0,360	136	99
Chr1	400267	A	AT	INDEL	PASS	MMC1,MMC8,MMC9,MMC10,MMC2,MMC3,MMC4,MMC5,MMC6,MMC7	-1	0	0	10	0	10	20	1	20	150410	3228	32.91	60	NA	NA	NA	0	336	99	0,333	389	99	0,389	339	99	0,339	304	99	0,304	374	99	0,374	239	99	0,239	366	99	0,366	343	99	0,343	184	99
Chr1	400276	TG	T	INDEL	PASS	MMC1,MMC8,MMC9,MMC10,MMC2,MMC3,MMC4,MMC5,MMC6,MMC7	-1	0	0	10	0	10	20	1	20	149927	3277	31.31	60	NA	NA	NA	0	330	99	0,330	391	99	0,391	333	99	0,333	307	99	0,307	371	99	0,371	265	99	0,265	366	99	0,366	362	99	0,362	207	99
Chr1	400300	GC	G	INDEL	PASS	MMC1,MMC8,MMC9,MMC10,MMC2,MMC3,MMC4,MMC5,MMC6,MMC7	-1	0	0	10	0	10	20	1	20	169759	3705	31.45	60	NA	NA	NA	0	389	99	0,389	431	99	0,431	349	99	0,349	327	99	0,327	414	99	0,414	323	99	0,323	411	99	0,411	399	99	0,399	261	99
Chr1	400307	TCGG	T	INDEL	PASS	MMC1,MMC8,MMC9,MMC10,MMC2,MMC3,MMC4,MMC5,MMC6,MMC7	-1	0	0	10	0	10	20	1	20	174919	3829	33.27	60	NA	NA	NA	0	397	99	0,397	443	99	0,443	360	99	0,360	345	99	0,345	423	99	0,423	343	99	0,343	422	99	0,422	417	99	0,417	276	99
Chr1	400319	GC	G	INDEL	PASS	MMC1,MMC8,MMC9,MMC10,MMC2,MMC3,MMC4,MMC5,MMC6,MMC7	-1	0	0	10	0	10	20	1	20	178376	4008	31.26	60	NA	NA	NA	0	418	99	0,418	463	99	0,463	379	99	0,379	359	99	0,359	440	99	0,440	363	99	0,363	437	99	0,437	423	99	0,423	300	99
Chr1	400385	CGACT	C	INDEL	PASS	MMC1,MMC8,MMC9,MMC10,MMC2,MMC3,MMC4,MMC5,MMC6,MMC7	-1	0	0	10	0	10	20	1	20	181699	4118	27.76	60	NA	NA	NA	0	418	99	0,418	455	99	0,455	376	99	0,376	358	99	0,358	393	99	0,393	469	99	0,469	431	99	0,431	384	99	0,380	355	99
Chr1	400393	CG	C	INDEL	PASS	MMC1,MMC8,MMC9,MMC10,MMC2,MMC3,MMC4,MMC5,MMC6,MMC7	-1	0	0	10	0	10	20	1	20	182650	4105	29.09	60	NA	NA	NA	0	422	99	0,422	453	99	0,453	384	99	0,384	358	99	0,358	400	99	0,400	475	99	0,475	435	99	0,435	397	99	0,395	361	99
Chr1	400462	GT	G	INDEL	PASS	MMC1,MMC8,MMC9,MMC10,MMC2,MMC3,MMC4,MMC5,MMC6,MMC7	-1	0	0	10	0	10	20	1	20	156294	3911	26.08	60	-0.66	1.49	0	0	376	99	0,376	455	99	0,455	385	99	0,385	325	99	0,325	382	99	0,382	469	99	1468	371	99	0,371	393	99	0,393	359	99
Chr1	400537	CG	C	INDEL	PASS	MMC1,MMC8,MMC9,MMC10,MMC2,MMC3,MMC4,MMC5,MMC6,MMC7	-1	0	0	10	0	10	20	1	20	134011	3625	33.85	60	NA	NA	NA	0	367	99	0,367	404	99	0,404	353	99	0,353	285	99	0,285	350	99	0,350	403	99	0,403	329	99	0,329	385	99	0,385	368	99
Chr1	401397	CT	C	INDEL	PASS	MMC1,MMC8,MMC9,MMC10,MMC2,MMC3,MMC4,MMC5,MMC6,MMC7	-1	0	0	10	0	10	20	1	20	129322	3701	27.08	60	NA	NA	NA	0	360	99	0,360	408	99	0,408	375	99	0,373	343	99	0,343	350	99	0,350	399	99	0,399	371	99	0,371	343	99	0,343	353	99
Chr1	401419	A	AC	INDEL	PASS	MMC1,MMC8,MMC9,MMC10,MMC2,MMC3,MMC4,MMC5,MMC6,MMC7	-1	0	0	10	0	10	20	1	20	122051	3720	33.5	60	-0.768	-0.344	0	0	361	99	0,361	424	99	2422	365	99	0,365	351	99	0,351	357	99	0,357	416	99	0,416	365	99	0,365	350	99	0,350	336	99
Chr1	402284	A	T	SNP	PASS	MMC1,MMC8,MMC9,MMC10,MMC2,MMC3,MMC4,MMC5,MMC6,MMC7	0	0	0	10	0	10	20	1	20	141726	3857	25.42	60	-0.745	-0.759	0	0	390	99	0,390	437	99	0,437	387	99	0,387	341	99	0,341	371	99	0,371	452	99	1451	393	99	0,393	357	99	0,357	364	99
Chr1	404002	G	T	SNP	PASS	MMC9	0	1	9	0	0	1	1	0.05	20	7129.39	2653	19.43	60	-0.57	0.565	0	9.568	223	99	223,0	309	99	309,0	367	99	147220	210	99	210,0	212	99	212,0	304	99	304,0	258	99	258,0	279	99	279,0	242	99
Chr1	465267	C	T	SNP	PASS	MMC1	1	0	9	1	0	1	2	0.1	20	11098.1	2598	27.65	60	NA	NA	NA	0	294	99	0,294	309	99	309,0	241	99	241,0	210	99	210,0	212	99	212,0	304	99	304,0	258	99	258,0	279	99	279,0	242	99
Chr1	511583	A	G	SNP	PASS	MMC1,MMC8,MMC9,MMC10,MMC2,MMC3,MMC4,MMC5,MMC6,MMC7	1	0	0	10	0	10	20	1	20	143674	3821	29.48	60	NA	NA	NA	0	429	99	0,429	410	99	0,410	331	99	0,331	356	99	0,356	370	99	0,370	432	99	0,431	375	99	0,375	418	99	0,418	362	99
Chr1	614214	T	C	SNP	PASS	MMC8,MMC9,MMC10,MMC3,MMC4,MMC5,MMC6,MMC7	1	0	2	8	0	8	16	0.8	20	123302	3766	30.56	60	NA	NA	NA	0	242	99	242,0	488	99	0,488	414	99	0,414	348	99	0,348	249	99	249,0	486	99	0,486	381	99	0,381	416	99	0,416	354	99
Chr1	629595	GC	G	INDEL	PASS	MMC8,MMC9,MMC10,MMC3,MMC4,MMC5,MMC6,MMC7	-1	0	2	8	0	8	16	0.8	20	136310	4177	33.63	60	NA	NA	NA	0	242	99	242,0	555	99	0,555	438	99	0,438	384	99	0,384	249	99	249,0	512	99	0,512	448	99	0,448	428	99	0,428	457	99
Chr1	630210	G	A	SNP	PASS	MMC1	1	1	9	0	0	1	1	0.05	20	8327.39	2365	18.59	60	-1	0.493	0	0.53	242	99	242,0	248	99	248,0	183	99	183,0	201	99	201,0	448	99	178270	253	99	253,0	219	99	219,0	192	99	192,0	189	99
Chr1	731324	C	T	SNP	PASS	MMC1	1	0	9	1	0	1	2	0.1	20	12184.1	2146	30.55	60	NA	NA	NA	0	330	99	0,330	248	99	248,0	183	99	183,0	165	99	165,0	177	99	177,0	253	99	253,0	219	99	219,0	192	99	192,0	189	99
Chr1	787429	G	A	SNP	PASS	MMC1	1	0	9	1	0	1	2	0.1	20	16008.1	2255	32.62	60	NA	NA	NA	0	439	99	0,439	248	99	248,0	183	99	183,0	165	99	165,0	177	99	177,0	253	99	253,0	219	99	219,0	192	99	192,0	189	99
Chr1	849123	A	G	SNP	PASS	MMC1	1	1	9	0	0	1	1	0.05	20	9006.39	2230	21.81	60	0.461	-0.245	0	6.485	413	99	134279	248	99	248,0	183	99	183,0	165	99	165,0	177	99	177,0	253	99	253,0	219	99	219,0	192	99	192,0	189	99
Chr1	888958	C	T	SNP	PASS	MMC9	1	1	9	0	0	1	1	0.05	20	4644.39	1731	12.83	60	1.23	1.07	0	0	158	99	158,0	177	99	177,0	362	99	214148	127	99	127,0	137	99	137,0	191	99	191,0	162	99	162,0	142	99	142,0	135	99
Chr1	888967	C	A	SNP	PASS	MMC8	0	1	9	0	0	1	1	0.05	20	5621.39	1871	13.38	60	-1.38	0.796	0	1.107	158	99	158,0	420	99	235185	258	99	258,0	127	99	127,0	137	99	137,0	191	99	191,0	162	99	162,0	142	99	142,0	135	99
Chr1	889209	C	A	SNP	PASS	MMC8	0	1	9	0	0	1	1	0.05	20	8612.39	1909	18.76	60	1.71	-0.19	0	1.107	158	99	158,0	459	99	204255	258	99	258,0	127	99	127,0	137	99	137,0	191	99	191,0	162	99	162,0	142	99	142,0	135	99
Chr1	964865	A	G	SNP	PASS	MMC8,MMC9,MMC10,MMC7	1	0	6	4	0	4	8	0.4	20	56529.9	2439	29.33	60	NA	NA	NA	0	158	99	158,0	411	99	0,411	346	99	0,346	359	99	0,359	137	99	137,0	191	99	191,0	162	99	162,0	142	99	142,0	135	99
Chr1	1034939	G	A	SNP	PASS	MMC8,MMC9,MMC10,MMC5,MMC7	1	0	5	5	0	5	10	0.5	20	70158.9	2628	35.36	60	2.58	1.46	0	0	158	99	158,0	431	99	0,431	346	99	0,346	311	99	0,311	137	99	137,0	191	99	191,0	162	99	162,0	359	99	1358	135	99
Chr1	1069025	T	C	SNP	PASS	MMC1,MMC8,MMC9,MMC10,MMC2,MMC3,MMC4,MMC5,MMC6,MMC7	1	0	0	10	0	10	20	1	20	150492	4001	34.3	60	NA	NA	NA	0	434	99	0,434	449	99	0,449	355	99	0,355	346	99	0,346	356	99	0,356	464	99	0,464	366	99	0,366	451	99	0,451	365	99
Chr1	1084731	G	A	SNP	PASS	MMC1	1	1	9	0	0	1	1	0.05	20	3660.39	2727	8.36	60	1.15	-0.266	0	3.59	438	99	308130	308	99	308,0	234	99	234,0	210	99	210,0	249	99	249,0	304	99	304,0	275	99	275,0	250	99	250,0	238	99
Chr1	1163919	G	A	SNP	PASS	MMC10	1	1	9	0	0	1	1	0.05	20	1766.39	2067	4.83	60	-0.306	-0.145	0	0	41	99	41,0	216	99	216,0	202	99	202,0	366	99	286,80	209	99	209,0	214	99	214,0	211	99	211,0	224	99	224,0	192	99
Chr1	1228221	G	A	SNP	PASS	MMC8,MMC9,MMC10,MMC4,MMC5,MMC6,MMC7	1	0	3	7	0	7	14	0.7	20	92445.9	2866	27	60	NA	NA	NA	0	41	99	41,0	369	99	0,367	309	99	0,309	261	99	0,261	209	99	209,0	214	99	214,0	369	99	0,369	373	99	0,373	371	99
Chr1	1355100	C	T	SNP	PASS	MMC8,MMC9,MMC10,MMC3,MMC4,MMC5,MMC6,MMC7	1	0	2	8	0	8	16	0.8	20	125482	3658	30.82	60	1.39	1.13	0	0	41	99	41,0	420	99	0,420	408	99	0,408	332	99	0,332	209	99	209,0	506	99	0,506	473	99	0,471	449	99	0,449	414	99
Chr1	1374520	G	A	SNP	PASS	MMC1	1	0	9	1	0	1	2	0.1	20	12315.1	1371	29.27	60	NA	NA	NA	0	41	99	41,0	329	99	329,0	261	99	261,0	201	99	201,0	340	99	0,338	34	99	34,0	41	99	41,0	39	99	39,0	40	99
Chr1	1374718	G	A	SNP	PASS	MMC10	1	1	9	0	0	1	1	0.05	20	2102.43	1113	10.67	60	0.482	-0.325	0	2.463	41	99	41,0	329	99	329,0	261	99	261,0	204	99	123,74	39	99	39,0	34	99	34,0	41	99	41,0	39	99	39,0	40	99
Chr1	1374762	G	GGTTTTT	INDEL	PASS	MMC10	-1	1	9	0	0	1	1	0.05	20	379.43	1071	2.11	60	2.61	-0.729	0	54.779	41	99	41,0	329	99	329,0	261	99	261,0	180	99	161,19	39	99	39,0	34	99	34,0	41	99	41,0	39	99	39,0	40	99
Chr1	1374765	A	AACCCT	INDEL	PASS	MMC10	-1	1	9	0	0	1	1	0.05	20	427.43	1072	2.36	60	2.74	-1.9	0	62.003	41	99	41,0	329	99	329,0	261	99	261,0	181	99	159,22	39	99	39,0	34	99	34,0	41	99	41,0	39	99	39,0	40	99
Chr1	1375028	CG	C	INDEL	PASS	MMC8,MMC9,MMC10	-1	1	7	2	0	3	5	0.25	20	22408.1	1276	23.49	60	-1.43	-1.49	0	0.634	41	99	41,0	368	99	0,368	315	99	0,315	271	99	222,49	39	99	39,0	34	99	34,0	41	99	41,0	39	99	39,0	40	99
Chr1	1493489	C	T	SNP	PASS	MMC10	1	1	9	0	0	1	1	0.05	20	1588.39	806	5.29	60	-0.407	-0.343	0	0.5	183	99	183,0	40	99	40,0	46	99	46,0	300	99	232,68	44	99	44,0	36	99	36,0	43	99	43,0	36	99	36,0	41	99
Chr1	1576617	T	C	SNP	PASS	MMC1	1	0	9	1	0	1	2	0.1	20	17783.1	834	35.92	60	NA	NA	NA	0	473	99	0,473	40	99	40,0	46	99	46,0	38	99	38,0	44	99	44,0	36	99	36,0	43	99	43,0	36	99	36,0	41	99
Chr1	1588528	C	T	SNP	PASS	MMC8,MMC9,MMC10,MMC3,MMC4,MMC5,MMC6,MMC7	1	0	2	8	0	8	16	0.8	20	99506.3	2876	29.63	60	NA	NA	NA	0	48	99	48,0	388	99	0,388	301	99	0,301	311	99	0,311	43	99	43,0	421	99	0,421	314	99	0,314	315	99	0,315	353	99
Chr1	1603145	C	T	SNP	PASS	MMC1,MMC8,MMC9,MMC10,MMC2,MMC3,MMC4,MMC5,MMC6,MMC7	1	0	0	10	0	10	20	1	20	155405	4096	28.76	60	NA	NA	NA	0	382	99	0,382	456	99	0,456	339	99	0,339	369	99	0,369	437	99	0,437	481	99	0,481	431	99	0,431	414	99	0,414	369	99
Chr1	1615936	C	T	SNP	PASS	MMC8,MMC9,MMC10,MMC3,MMC4,MMC5,MMC6,MMC7	1	0	2	8	0	8	16	0.8	20	116968	3354	29.94	60	NA	NA	NA	0	38	99	38,0	444	99	0,444	375	99	0,374	329	99	0,329	142	99	142,0	457	99	0,457	410	99	0,410	411	99	0,408	368	99
Chr1	1622828	G	A	SNP	PASS	MMC8,MMC9,MMC10,MMC3,MMC4,MMC5,MMC6,MMC7	1	0	2	8	0	8	16	0.8	20	110982	3170	31.54	60	-0.585	0.98	0	0	38	99	38,0	421	99	0,421	327	99	1326	357	99	0,357	142	99	142,0	408	99	0,408	418	99	0,418	363	99	0,363	330	99
Chr1	1654025	A	AGGCTCAG	INDEL	PASS	MMC6	-1	1	9	0	0	1	1	0.05	20	3214.43	1588	26.13	60	1.29	-4.33	0	15.641	38	99	38,0	189	99	189,0	146	99	146,0	129	99	129,0	142	99	142,0	163	99	163,0	251	99	251,0	160	99	160,0	123	99
Chr1	1670885	G	A	SNP	PASS	MMC8,MMC9,MMC10,MMC3,MMC4,MMC5,MMC6,MMC7	1	0	2	8	0	8	16	0.8	20	129425	3651	28.86	60	2.38	1.23	0	0	38	99	38,0	449	99	0,449	421	99	1420	382	99	0,382	142	99	142,0	496	99	0,496	408	99	2406	417	99	0,417	451	99
Chr1	1685234	G	A	SNP	PASS	MMC8,MMC9,MMC10,MMC3,MMC4,MMC5,MMC6,MMC7	1	0	2	8	0	8	16	0.8	20	106599	3074	29.41	60	-0.596	0.984	0	0	38	99	38,0	393	99	0,393	349	99	0,349	286	99	0,286	142	99	142,0	412	99	0,412	345	99	1344	361	99	0,361	356	99
Chr1	1720534	G	A	SNP	PASS	MMC8,MMC9,MMC10,MMC3,MMC4,MMC5,MMC6,MMC7	1	0	2	8	0	8	16	0.8	20	109255	3068	31.11	60	NA	NA	NA	0	38	99	38,0	392	99	0,392	334	99	0,334	324	99	0,324	142	99	142,0	416	99	0,416	321	99	0,321	402	99	0,402	363	99
Chr1	1780365	G	A	SNP	PASS	MMC1	1	1	9	0	0	1	1	0.05	20	6149.39	803	14.5	60	-1.41	-1.29	0	4.984	38	99	38,0	45	99	45,0	41	99	41,0	45	99	45,0	424	99	222202	44	99	44,0	42	99	42,0	38	99	38,0	42	99
Chr1	2041077	C	T	SNP	PASS	MMC8,MMC9,MMC10,MMC3,MMC4,MMC5,MMC6,MMC7	1	0	2	8	0	8	16	0.8	20	91595.3	2719	34.79	60	NA	NA	NA	0	33	99	33,0	380	99	0,380	324	99	0,324	287	99	0,285	42	99	42,0	368	99	0,366	288	99	0,288	349	99	0,349	325	99
Chr1	2141212	G	A	SNP	PASS	MMC3	1	0	9	1	0	1	2	0.1	20	14934.1	2797	34.33	60	NA	NA	NA	0	284	99	284,0	284	99	284,0	255	99	255,0	224	99	224,0	270	99	270,0	435	99	0,435	273	99	273,0	276	99	276,0	261	99
Chr1	2185432	G	A	SNP	PASS	MMC8,MMC9,MMC10,MMC3,MMC4,MMC5,MMC6,MMC7	1	0	2	8	0	8	16	0.8	20	112601	3373	29.4	60	NA	NA	NA	0	200	99	200,0	409	99	0,409	327	99	0,327	299	99	0,299	187	99	187,0	469	99	0,469	383	99	0,383	392	99	0,392	363	99
Chr1	2185668	C	G	SNP	PASS	MMC1	0	1	9	0	0	1	1	0.05	20	2523.39	2729	5.71	60	1.23	-1.01	0	0	442	99	340102	285	99	285,0	248	99	248,0	223	99	223,0	187	99	187,0	315	99	315,0	274	99	274,0	270	99	270,0	247	99
Chr1	2302125	G	A	SNP	PASS	MMC8,MMC9,MMC10,MMC3,MMC4,MMC5,MMC6,MMC7	1	0	2	8	0	8	16	0.8	20	107740	3153	36.76	60	NA	NA	NA	0	39	99	39,0	389	99	0,389	330	99	0,330	294	99	0,294	187	99	187,0	447	99	0,445	385	99	0,385	372	99	0,372	348	99
Chr1	2333201	TG	T	INDEL	PASS	MMC8,MMC9,MMC10,MMC2,MMC3,MMC4,MMC5,MMC6,MMC7	-1	0	1	9	0	9	18	0.9	20	130204	3583	30.54	60	NA	NA	NA	0	39	99	39,0	420	99	0,420	360	99	0,360	331	99	0,331	389	99	0,389	458	99	0,458	411	99	0,411	429	99	0,429	329	99
Chr1	2393933	G	A	SNP	PASS	MMC8,MMC9,MMC10,MMC3,MMC4,MMC5,MMC6,MMC7	1	0	2	8	0	8	16	0.8	20	110577	3076	21.53	60	NA	NA	NA	0	39	99	39,0	397	99	0,397	328	99	0,328	350	99	0,350	42	99	42,0	407	99	0,407	379	99	0,379	392	99	0,392	355	99
Chr1	2548673	T	C	SNP	PASS	MMC1,MMC8,MMC9,MMC10,MMC2,MMC3,MMC4,MMC5,MMC6,MMC7	1	0	0	10	0	10	20	1	20	128501	3415	34.87	60	-0.537	0.007	0	0	372	99	0,372	398	99	0,398	300	99	0,300	282	99	0,282	362	99	1359	409	99	0,409	349	99	2347	347	99	0,347	309	99
Chr1	2613823	G	A	SNP	PASS	MMC8,MMC9,MMC10,MMC3,MMC4,MMC5,MMC6,MMC7	1	0	2	8	0	8	16	0.8	20	138298	3613	31.04	60	NA	NA	NA	0	273	99	273,0	427	99	0,427	361	99	0,361	323	99	0,323	253	99	253,0	436	99	0,436	389	99	0,389	387	99	0,387	358	99
Chr1	2613832	A	G	SNP	PASS	MMC1,MMC8,MMC9,MMC10,MMC2,MMC3,MMC4,MMC5,MMC6,MMC7	1	0	0	10	0	10	20	1	20	165480	3780	27.86	60	NA	NA	NA	0	352	99	0,352	414	99	0,414	352	99	0,352	323	99	0,323	376	99	0,376	432	99	0,432	391	99	0,391	393	99	0,393	350	99
Chr1	2613883	C	A	SNP	PASS	MMC1	0	1	9	0	0	1	1	0.05	20	1486.39	2794	4.19	60	0.293	0.044	0	0.491	355	99	287,68	295	99	295,0	258	99	258,0	208	99	208,0	332	99	332,0	297	99	297,0	262	99	262,0	326	99	326,0	238	99
Chr1	2614154	C	A	SNP	PASS	MMC1	0	1	9	0	0	1	1	0.05	20	5342.39	2837	13.42	60	1.36	1.05	0	1.633	398	99	227171	295	99	295,0	258	99	258,0	208	99	208,0	332	99	332,0	297	99	297,0	262	99	262,0	326	99	326,0	238	99
Chr1	2630937	G	A	SNP	PASS	MMC9	1	1	9	0	0	1	1	0.05	20	6903.39	2619	17.79	60	-0.377	1.91	0	2.152	253	99	253,0	295	99	295,0	388	99	174214	208	99	208,0	197	99	197,0	297	99	297,0	262	99	262,0	257	99	257,0	238	99
Chr1	2640009	GT	G	INDEL	PASS	MMC1,MMC8,MMC9,MMC10,MMC2,MMC3,MMC4,MMC5,MMC6,MMC7	-1	0	0	10	0	10	20	1	20	87511.2	3000	30.72	60	-0.527	1.46	0	0	268	99	1267	299	99	0,299	287	99	0,287	236	99	0,236	278	99	0,278	345	99	0,345	331	99	0,331	301	99	0,301	247	99
Chr1	2842912	G	C	SNP	PASS	MMC1,MMC8,MMC9,MMC10,MMC2,MMC3,MMC4,MMC5,MMC6,MMC7	0	0	0	10	0	10	20	1	20	126199	3402	34.17	60	NA	NA	NA	0	331	99	0,331	355	99	0,355	282	99	0,282	294	99	0,294	333	99	0,333	436	99	0,436	354	99	0,354	356	99	0,356	322	99
Plas2	260	C	CT	INDEL	PASS	MMC1,MMC8,MMC9,MMC10,MMC2,MMC3,MMC4,MMC5,MMC6,MMC7	-1	0	0	10	0	10	20	1	20	167621	4799	28.6	60	NA	NA	NA	0	317	99	0,317	540	99	0,540	194	99	0,194	257	99	0,257	675	99	0,675	519	99	0,519	498	99	0,498	682	99	0,682	554	99
Plas3	111	C	CG	INDEL	PASS	MMC1,MMC8,MMC9,MMC10,MMC2,MMC3,MMC4,MMC5,MMC6,MMC7	-1	0	0	10	0	10	20	1	20	146220	4408	25.57	60	2.58	-0.266	0	0	239	99	0,239	460	99	0,460	291	99	0,290	292	99	0,292	379	99	0,379	535	99	0,535	442	99	2440	516	99	0,516	443	99
Plas3	199	C	CAT	INDEL	PASS	MMC1,MMC8,MMC9,MMC10,MMC2,MMC3,MMC4,MMC5,MMC6,MMC7	-1	0	0	10	0	10	20	1	20	199999	5859	33.11	60	-0.958	-0.038	0	0	298	99	0,298	601	99	0,597	380	99	0,377	398	99	0,396	500	99	3494	724	99	0,719	526	99	2524	650	99	3644	585	99
Plas3	744	TA	T	INDEL	PASS	MMC1,MMC8,MMC9,MMC10,MMC2,MMC3,MMC4,MMC5,MMC6,MMC7	-1	0	0	10	0	10	20	1	20	242885	6252	30.2	60	0.046	0.684	0	0	426	99	0,426	692	99	0,692	462	99	0,462	453	99	0,453	592	99	0,592	813	99	2811	647	99	0,647	743	99	0,743	662	99
Plas3	774	AC	A	INDEL	PASS	MMC1,MMC8,MMC9,MMC10,MMC2,MMC3,MMC4,MMC5,MMC6,MMC7	-1	0	0	10	0	10	20	1	20	247002	6174	30.49	60	NA	NA	NA	0	416	99	0,416	673	99	0,673	438	99	0,438	441	99	0,441	577	99	0,577	826	99	0,826	633	99	0,633	755	99	0,755	674	99
Plas3	844	C	CT	INDEL	PASS	MMC1,MMC8,MMC9,MMC10,MMC2,MMC3,MMC4,MMC5,MMC6,MMC7	-1	0	0	10	0	10	20	1	20	202487	6167	33.87	60	NA	NA	NA	0	410	99	0,410	694	99	0,694	433	99	0,433	405	99	0,405	584	99	0,584	836	99	0,836	623	99	0,619	677	99	0,677	657	99
Plas3	1719	C	CA	INDEL	PASS	MMC1,MMC8,MMC9,MMC10,MMC2,MMC3,MMC4,MMC5,MMC6,MMC7	-1	0	0	10	0	10	20	1	20	186491	5972	32.13	60	-0.048	-0.545	0	0	340	99	0,340	664	99	0,664	412	99	6406	451	99	2449	581	99	0,581	717	99	8709	617	99	6611	706	99	6700	640	99
Plas3	2089	TG	T	INDEL	PASS	MMC1,MMC8,MMC9,MMC10,MMC2,MMC3,MMC4,MMC5,MMC6,MMC7	-1	0	0	10	0	10	20	1	20	209068	6007	31.67	60	NA	NA	NA	0	395	99	0,395	639	99	0,639	411	99	0,411	418	99	0,416	564	99	0,564	780	99	0,780	601	99	0,601	783	99	0,783	581	99
Plas3	35253	A	G	SNP	PASS	MMC8,MMC9,MMC10,MMC3,MMC4,MMC5,MMC6,MMC7	1	0	2	8	0	8	16	0.8	20	226452	6728	29.53	60	NA	NA	NA	0	252	99	252,0	739	99	0,739	497	99	0,497	492	99	0,492	341	99	341,0	1014	99	0,1014	855	99	0,855	907	99	0,907	801	99
Plas3	56283	AGG	A,AG	INDEL	PASS	MMC1,MMC8,MMC9,MMC10,MMC2,MMC3,MMC4,MMC5,MMC6,MMC7	-1	10	0	0	0	10	10,10	0.500,0.500	20	22910.4	1509	23.24	60	0.878	0.302	0	0	80	99	6,32,34	138	99	9,55,55	73	99	6,32,27	91	99	7,36,41	105	99	4,42,44	133	99	10,43,64	126	99	14,45,57	135	99	6,49,59	115	99
Plas3	71222	C	T	SNP	PASS	MMC8,MMC9,MMC10,MMC3,MMC4,MMC5,MMC6,MMC7	1	0	2	8	0	8	16	0.8	20	168299	4640	32.63	60	-0.678	-0.218	0	0	41	99	41,0	610	99	0,610	374	99	0,374	405	99	0,405	43	99	43,0	739	99	1738	601	99	0,601	652	99	0,652	531	99
Plas3	76325	C	T	SNP	PASS	MMC8,MMC9,MMC10,MMC3,MMC4,MMC5,MMC6,MMC7	1	0	2	8	0	8	16	0.8	20	166890	4621	30.36	60	NA	NA	NA	0	41	99	41,0	625	99	0,625	391	99	0,391	388	99	0,388	43	99	43,0	678	99	0,678	561	99	0,561	651	99	0,651	601	99
Plas3	161133	TC	T	INDEL	PASS	MMC1,MMC8,MMC9,MMC2,MMC3,MMC4,MMC5,MMC6,MMC7	-1	9	1	0	0	9	9	0.45	20	7933.24	4897	3.08	60	1.72	4.52	0	6.159	291	99	223,56	317	99	161,85	227	99	119,53	300	16	246,41	378	99	269,84	435	99	211115	354	99	211,77	365	99	194,72	433	99
[truncated: 4 more columns]
